# Supplementary material
Source: Springer Nature journal article supplement (https://www.springermedizin.de/resource/supplementary/12957_2013_1408_MOESM13_ESM.pdf/9562532)
Supplement: MOESM13 [file 9562532]

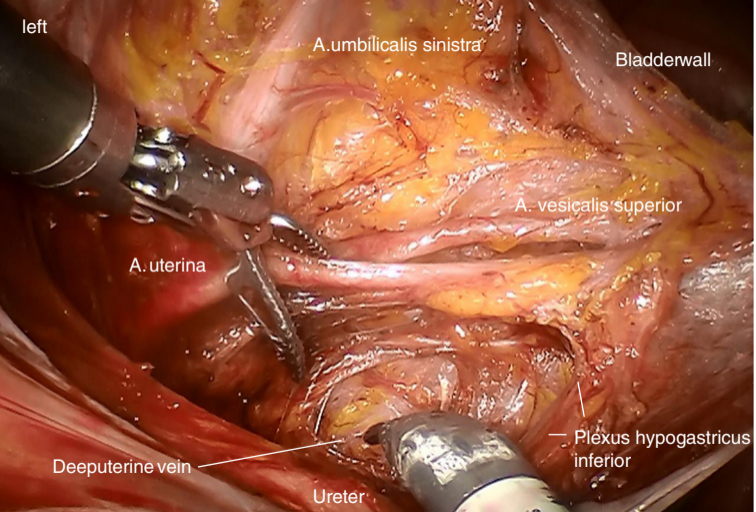

left

A.umbilicalis sinistra

Bladderwall

A. vesicalis superior

A. uterina

Deep uterine vein

Ureter

Plexus hypogastricus inferior
